# Supplementary material for: A Robust Classifier to Distinguish Noise from fMRI Independent Components
Source: PLoS One. 2014 Apr 18;9(4):e95493. doi: 10.1371/journal.pone.0095493 (PMC3991682; doi:10.1371/journal.pone.0095493)
Supplement: Table S1 — Selected Features. Spatial and temporal features and associated weights for each of the successful individual ICA models for comprehensive noise (M1) and three noise subtypes (M2)(M3)(M4), built with Data A, as well as the group ICA “All Noise types” model (M5). A weight of zero indicates that the feature was not selected in the model. (XLSX) [file pone.0095493.s001.xlsx]

## Sheet: Model_AllNoise
Feature Label	Weight
'Percent_total_activation_in_GM'	0.5586
'Kurtosis of IC distribution'	0.2665
'Percent_total_activation_MNI152_all_edges'	-0.2467
'Percent_total_activation_in_CSF'	-0.2153
'Angular_L'	0.2098
'Angular_R'	0.1924
'Cingulum_Ant_R'	0.1859
'Temporal_Sup_L'	0.1637
'Avg_distance_btw_10_local_max'	0.1619
'Temporal_Sup_R'	0.1604
'Caudate_R'	-0.1458
'Cuneus_L'	0.1439
'Skewness of IC distribution'	0.1421
'Percent_total_activation_in_eyeballs'	-0.1397
'kurtosis_measure_how_outlier-prone_ts'	-0.1389
'Max_cluster_size_10_local_max_region_growing_thresh_2.5'	0.1339
'Paracentral_Lobule_L'	-0.1323
'Temporal_Pole_Mid_L'	-0.1276
'Percent_total_activation_skull'	-0.1262
'Caudate_L'	-0.1214
'Spatial Entropy of IC distribution'	-0.1207
'Cuneus_R'	0.1181
'Cingulum_Mid_L'	-0.1171
'Occipital_Mid_R'	0.1149
'biggest_jump_maxmin'	-0.1135
'SupraMarginal_R'	0.1102
'Temporal_Inf_L'	-0.1099
'ParaHippocampal_L'	-0.1077
'Frontal_Inf_Tri_L'	0.1051
'Cingulum_Ant_L'	0.1021
'mean_response_over_time'	0.1011
'Frontal_Inf_Oper_R'	0.0941
'Parietal_Sup_R'	0.0936
'Rectus_R'	-0.0929
'Hpsd_bin_12_freq0_to_pi_0.42143'	0.09
'Hpsd_bin_38_freq0_to_pi_1.4175'	-0.0883
'Cingulum_Post_R'	-0.0877
'Occipital_Mid_L'	0.0873
'Olfactory_L'	-0.0867
'Parietal_Inf_R'	0.0861
'Min_cluster_size_10_local_max_region_growing_thresh_2.5'	0.084
'Frontal_Sup_Orb_R'	-0.0834
'Cingulum_Mid_R'	-0.0795
'Amygdala_L'	-0.0777
'Hpsd_bin_20_freq0_to_pi_0.72793'	-0.0765
'five_lag_auto_correlation'	-0.0758
'Cerebellum_7b_L'	-0.0747
'Paracentral_Lobule_R'	-0.0725
'skewness_assymetry_ts_around_mean'	0.0696
'Lingual_R'	0.0668
'Percent_total_activation_spinal_cord'	-0.0657
'Vermis_9'	-0.0646
'Occipital_Inf_L'	0.064
'Hpsd_bin_29_freq0_to_pi_1.0727'	-0.0638
'Insula_L'	0.0588
'power_band_0.02_to_0.05_Hz'	0.0557
'Insula_R'	0.055
'Calcarine_L'	0.0536
'SupraMarginal_L'	0.0527
'Hpsd_bin_28_freq0_to_pi_1.0344'	-0.0512
'Cerebellum_10_R'	-0.0501
'power_band_0.0_to_0.008_Hz'	-0.048
'avg_jump_max_min'	0.048
'Temporal_Pole_Sup_R'	0.0479
'Frontal_Mid_Orb_L'	-0.0467
'Calcarine_R'	0.0457
'Temporal_Mid_R'	0.0443
'Cerebellum_6_R'	0.0405
'Amygdala_R'	-0.0403
'Lingual_L'	0.0381
'Rolandic_Oper_R'	0.0378
'Cerebellum_Crus1_L'	0.0377
'Hpsd_bin_19_freq0_to_pi_0.68962'	0.0375
'Percent_total_activation_ventricles'	-0.0372
'Hpsd_bin_4_freq0_to_pi_0.11494'	-0.0368
'ParaHippocampal_R'	-0.0344
'Occipital_Inf_R'	0.0329
'Cerebellum_8_R'	-0.0328
'Hpsd_bin_21_freq0_to_pi_0.76624'	-0.0322
'Cerebellum_Crus1_R'	0.032
'Hpsd_bin_27_freq0_to_pi_0.99611'	0.0315
'Temporal_Pole_Mid_R'	-0.0309
'Cerebellum_8_L'	-0.0305
'Parietal_Inf_L'	0.0299
'Hpsd_bin_32_freq0_to_pi_1.1877'	-0.0299
'Hpsd_bin_26_freq0_to_pi_0.9578'	-0.0284
'Postcentral_L'	0.0275
'Hpsd_bin_7_freq0_to_pi_0.22987'	0.0258
'Frontal_Inf_Tri_R'	0.0248
'Hpsd_bin_30_freq0_to_pi_1.1111'	0.0227
'Hpsd_bin_22_freq0_to_pi_0.80455'	0.0221
'Temporal_Mid_L'	0.0217
'Frontal_Sup_Orb_L'	-0.0216
'Vermis_3'	-0.0204
'Hpsd_bin_40_freq0_to_pi_1.4942'	-0.0197
'num_local_mins_div_by_timepoints'	-0.0194
'Hpsd_bin_34_freq0_to_pi_1.2643'	-0.0192
'Hpsd_bin_41_freq0_to_pi_1.5325'	-0.0179
'power_band_0.1_to_0.25_Hz'	-0.0167
'Frontal_Sup_R'	-0.0159
'Hpsd_bin_2_freq0_to_pi_0.038312'	-0.015
'Percent_total_activation_in_cerebellum'	0.014
'Cerebellum_6_L'	0.0139
'Cerebellum_7b_R'	-0.0136
'Frontal_Mid_R'	0.0132
'Hpsd_bin_24_freq0_to_pi_0.88118'	-0.0123
'avg_distance_between_min_peaks'	0.0122
'high_frequency_noise_percentage'	-0.0115
'Occipital_Sup_L'	0.0109
'Supp_Motor_Area_R'	-0.0108
'Precuneus_L'	0.0107
'Hpsd_bin_18_freq0_to_pi_0.65131'	-0.0094
'Thalamus_L'	-0.008
'Frontal_Mid_L'	0.0079
'Hpsd_bin_15_freq0_to_pi_0.53637'	0.0068
'Hpsd_bin_42_freq0_to_pi_1.5708'	-0.0068
'Frontal_Sup_L'	-0.0066
'Hpsd_bin_16_freq0_to_pi_0.57468'	0.0054
'avg_distance_between_max_peaks'	0.0048
'Hpsd_bin_83_freq0_to_pi_3.1416'	-0.0047
'Hpsd_bin_80_freq0_to_pi_3.0267'	-0.0042
'Hpsd_bin_81_freq0_to_pi_3.065'	-0.0041
'Hpsd_bin_78_freq0_to_pi_2.95'	-0.004
'Hpsd_bin_79_freq0_to_pi_2.9883'	-0.0039
'Hpsd_bin_82_freq0_to_pi_3.1033'	-0.0039
'Hpsd_bin_67_freq0_to_pi_2.5286'	-0.0032
'Hpsd_bin_76_freq0_to_pi_2.8734'	-0.0032
'Cerebellum_10_L'	-0.0032
'Hpsd_bin_73_freq0_to_pi_2.7585'	-0.003
'Hpsd_bin_68_freq0_to_pi_2.5669'	-0.0029
'Vermis_8'	-0.0028
'Hpsd_bin_75_freq0_to_pi_2.8351'	-0.0028
'Hpsd_bin_77_freq0_to_pi_2.9117'	-0.0027
'Hpsd_bin_43_freq0_to_pi_1.6091'	-0.0027
'Vermis_6'	0.0024
'Hpsd_bin_72_freq0_to_pi_2.7202'	-0.0024
'Hpsd_bin_44_freq0_to_pi_1.6474'	-0.0022
'Hpsd_bin_71_freq0_to_pi_2.6818'	-0.0021
'Hpsd_bin_74_freq0_to_pi_2.7968'	-0.002
'Hpsd_bin_65_freq0_to_pi_2.452'	-0.0019
'Hpsd_bin_70_freq0_to_pi_2.6435'	-0.0016
'dynamic_FFT_diff_low'	-0.0013
'Hpsd_bin_69_freq0_to_pi_2.6052'	-0.001
'Hpsd_bin_64_freq0_to_pi_2.4137'	-0.0009
'Hpsd_bin_63_freq0_to_pi_2.3754'	-0.0007
'Hpsd_bin_66_freq0_to_pi_2.4903'	-0.0006
'Hpsd_bin_62_freq0_to_pi_2.337'	-0.0006
'Precentral_L'	0
'Precentral_R'	0
'Frontal_Mid_Orb_R'	0
'Frontal_Inf_Oper_L'	0
'Frontal_Inf_Orb_L'	0
'Frontal_Inf_Orb_R'	0
'Rolandic_Oper_L'	0
'Supp_Motor_Area_L'	0
'Olfactory_R'	0
'Frontal_Sup_Medial_L'	0
'Frontal_Sup_Medial_R'	0
'Frontal_Med_Orb_L'	0
'Frontal_Med_Orb_R'	0
'Rectus_L'	0
'Cingulum_Post_L'	0
'Hippocampus_L'	0
'Hippocampus_R'	0
'Occipital_Sup_R'	0
'Fusiform_L'	0
'Fusiform_R'	0
'Postcentral_R'	0
'Parietal_Sup_L'	0
'Precuneus_R'	0
'Putamen_L'	0
'Putamen_R'	0
'Pallidum_L'	0
'Pallidum_R'	0
'Thalamus_R'	0
'Heschl_L'	0
'Heschl_R'	0
'Temporal_Pole_Sup_L'	0
'Temporal_Inf_R'	0
'Cerebellum_Crus2_L'	0
'Cerebellum_Crus2_R'	0
'Cerebellum_3_L'	0
'Cerebellum_3_R'	0
'Cerebellum_4_5_L'	0
'Cerebellum_4_5_R'	0
'Cerebellum_9_L'	0
'Cerebellum_9_R'	0
'Vermis_1_2'	0
'Vermis_4_5'	0
'Vermis_7'	0
'Vermis_10'	0
'Avg_Z_score_10_nodes_highest_connectivity'	0
'Mean_cluster_size_10_local_max_region_growing_thresh_2.5'	0
'Percentage_activation_voxels_LR_symmetric'	0
'Percent_total_activation_in_WM'	0
'Percent_total_activation_midbrain'	0
'num_local_maxes_div_by_timepoints'	0
'power_band_0.008_to_0.02_Hz'	0
'power_band_0.05_to_0.1_Hz'	0
'one_lag_auto_correlation'	0
'two_lag_auto_correlation'	0
'three_lag_auto_correlation'	0
'four_lag_auto_correlation'	0
'temporal_entropy_of_ts'	0
'Hpsd_bin_1_freq0_to_pi_0'	0
'Hpsd_bin_3_freq0_to_pi_0.076624'	0
'Hpsd_bin_5_freq0_to_pi_0.15325'	0
'Hpsd_bin_6_freq0_to_pi_0.19156'	0
'Hpsd_bin_8_freq0_to_pi_0.26818'	0
'Hpsd_bin_9_freq0_to_pi_0.3065'	0
'Hpsd_bin_10_freq0_to_pi_0.34481'	0
'Hpsd_bin_11_freq0_to_pi_0.38312'	0
'Hpsd_bin_13_freq0_to_pi_0.45975'	0
'Hpsd_bin_14_freq0_to_pi_0.49806'	0
'Hpsd_bin_17_freq0_to_pi_0.61299'	0
'Hpsd_bin_23_freq0_to_pi_0.84287'	0
'Hpsd_bin_25_freq0_to_pi_0.91949'	0
'Hpsd_bin_31_freq0_to_pi_1.1494'	0
'Hpsd_bin_33_freq0_to_pi_1.226'	0
'Hpsd_bin_35_freq0_to_pi_1.3026'	0
'Hpsd_bin_36_freq0_to_pi_1.3409'	0
'Hpsd_bin_37_freq0_to_pi_1.3792'	0
'Hpsd_bin_39_freq0_to_pi_1.4559'	0
'Hpsd_bin_45_freq0_to_pi_1.6857'	0
'Hpsd_bin_46_freq0_to_pi_1.724'	0
'Hpsd_bin_47_freq0_to_pi_1.7624'	0
'Hpsd_bin_48_freq0_to_pi_1.8007'	0
'Hpsd_bin_49_freq0_to_pi_1.839'	0
'Hpsd_bin_50_freq0_to_pi_1.8773'	0
'Hpsd_bin_51_freq0_to_pi_1.9156'	0
'Hpsd_bin_52_freq0_to_pi_1.9539'	0
'Hpsd_bin_53_freq0_to_pi_1.9922'	0
'Hpsd_bin_54_freq0_to_pi_2.0305'	0
'Hpsd_bin_55_freq0_to_pi_2.0689'	0
'Hpsd_bin_56_freq0_to_pi_2.1072'	0
'Hpsd_bin_57_freq0_to_pi_2.1455'	0
'Hpsd_bin_58_freq0_to_pi_2.1838'	0
'Hpsd_bin_59_freq0_to_pi_2.2221'	0
'Hpsd_bin_60_freq0_to_pi_2.2604'	0
'Hpsd_bin_61_freq0_to_pi_2.2987'	0
'dynamic_range_high'	0
'dynamic_range_low'	0
'dynamic_count_diff_high'	0
'dynamic_count_diff_low'	0
'dynamic_FFT_diff_high'	0
'low_freq_to_high_power_ratio'	0

## Sheet: Model_Eyeballs
Feature	Weight
'Percent_total_activation_in_eyeballs'	0.5032
'Percent_total_activation_in_GM'	-0.1894
'Spatial Entropy of IC distribution'	0.1884
'Avg_distance_btw_10_local_max'	0.1797
'Max_cluster_size_10_local_max_region_growing_thresh_2.5'	-0.0674
'Mean_cluster_size_10_local_max_region_growing_thresh_2.5'	-0.0653
'Percent_total_activation_in_WM'	-0.0444
'Skewness of IC distribution'	0.0354
'Percentage_activation_voxels_LR_symmetric'	0.0288
'Olfactory_R'	-0.017
'Rectus_L'	-0.0085
'Hpsd_bin_49_freq0_to_pi_1.839'	-0.0072
'Hpsd_bin_48_freq0_to_pi_1.8007'	-0.0071
'Hpsd_bin_47_freq0_to_pi_1.7624'	-0.0071
'Hpsd_bin_50_freq0_to_pi_1.8773'	-0.007
'Amygdala_L'	-0.0069
'Hpsd_bin_51_freq0_to_pi_1.9156'	-0.0069
'Hpsd_bin_52_freq0_to_pi_1.9539'	-0.0068
'Hpsd_bin_53_freq0_to_pi_1.9922'	-0.0063
'Hpsd_bin_54_freq0_to_pi_2.0305'	-0.0061
'Hpsd_bin_46_freq0_to_pi_1.724'	-0.0059
'Hpsd_bin_45_freq0_to_pi_1.6857'	-0.0059
'Hpsd_bin_44_freq0_to_pi_1.6474'	-0.0058
'Hpsd_bin_55_freq0_to_pi_2.0689'	-0.0055
'Hpsd_bin_56_freq0_to_pi_2.1072'	-0.0051
'Hpsd_bin_57_freq0_to_pi_2.1455'	-0.0045
'Hpsd_bin_58_freq0_to_pi_2.1838'	-0.0043
'Hpsd_bin_59_freq0_to_pi_2.2221'	-0.0037
'Cingulum_Post_R'	-0.0035
'Hpsd_bin_60_freq0_to_pi_2.2604'	-0.0032
'Hpsd_bin_40_freq0_to_pi_1.4942'	-0.0026
'Hpsd_bin_61_freq0_to_pi_2.2987'	-0.0023
'Hpsd_bin_42_freq0_to_pi_1.5708'	-0.0022
'Hpsd_bin_62_freq0_to_pi_2.337'	-0.0016
'Hpsd_bin_43_freq0_to_pi_1.6091'	-0.0016
'Hpsd_bin_12_freq0_to_pi_0.42143'	0.0013
'Hpsd_bin_10_freq0_to_pi_0.34481'	-0.0012
'Hpsd_bin_63_freq0_to_pi_2.3754'	-0.0011
'Hpsd_bin_64_freq0_to_pi_2.4137'	-0.0005
'Parietal_Sup_R'	-0.0004
'Precentral_L'	0
'Precentral_R'	0
'Frontal_Sup_L'	0
'Frontal_Sup_R'	0
'Frontal_Sup_Orb_L'	0
'Frontal_Sup_Orb_R'	0
'Frontal_Mid_L'	0
'Frontal_Mid_R'	0
'Frontal_Mid_Orb_L'	0
'Frontal_Mid_Orb_R'	0
'Frontal_Inf_Oper_L'	0
'Frontal_Inf_Oper_R'	0
'Frontal_Inf_Tri_L'	0
'Frontal_Inf_Tri_R'	0
'Frontal_Inf_Orb_L'	0
'Frontal_Inf_Orb_R'	0
'Rolandic_Oper_L'	0
'Rolandic_Oper_R'	0
'Supp_Motor_Area_L'	0
'Supp_Motor_Area_R'	0
'Olfactory_L'	0
'Frontal_Sup_Medial_L'	0
'Frontal_Sup_Medial_R'	0
'Frontal_Med_Orb_L'	0
'Frontal_Med_Orb_R'	0
'Rectus_R'	0
'Insula_L'	0
'Insula_R'	0
'Cingulum_Ant_L'	0
'Cingulum_Ant_R'	0
'Cingulum_Mid_L'	0
'Cingulum_Mid_R'	0
'Cingulum_Post_L'	0
'Hippocampus_L'	0
'Hippocampus_R'	0
'ParaHippocampal_L'	0
'ParaHippocampal_R'	0
'Amygdala_R'	0
'Calcarine_L'	0
'Calcarine_R'	0
'Cuneus_L'	0
'Cuneus_R'	0
'Lingual_L'	0
'Lingual_R'	0
'Occipital_Sup_L'	0
'Occipital_Sup_R'	0
'Occipital_Mid_L'	0
'Occipital_Mid_R'	0
'Occipital_Inf_L'	0
'Occipital_Inf_R'	0
'Fusiform_L'	0
'Fusiform_R'	0
'Postcentral_L'	0
'Postcentral_R'	0
'Parietal_Sup_L'	0
'Parietal_Inf_L'	0
'Parietal_Inf_R'	0
'SupraMarginal_L'	0
'SupraMarginal_R'	0
'Angular_L'	0
'Angular_R'	0
'Precuneus_L'	0
'Precuneus_R'	0
'Paracentral_Lobule_L'	0
'Paracentral_Lobule_R'	0
'Caudate_L'	0
'Caudate_R'	0
'Putamen_L'	0
'Putamen_R'	0
'Pallidum_L'	0
'Pallidum_R'	0
'Thalamus_L'	0
'Thalamus_R'	0
'Heschl_L'	0
'Heschl_R'	0
'Temporal_Sup_L'	0
'Temporal_Sup_R'	0
'Temporal_Pole_Sup_L'	0
'Temporal_Pole_Sup_R'	0
'Temporal_Mid_L'	0
'Temporal_Mid_R'	0
'Temporal_Pole_Mid_L'	0
'Temporal_Pole_Mid_R'	0
'Temporal_Inf_L'	0
'Temporal_Inf_R'	0
'Cerebellum_Crus1_L'	0
'Cerebellum_Crus1_R'	0
'Cerebellum_Crus2_L'	0
'Cerebellum_Crus2_R'	0
'Cerebellum_3_L'	0
'Cerebellum_3_R'	0
'Cerebellum_4_5_L'	0
'Cerebellum_4_5_R'	0
'Cerebellum_6_L'	0
'Cerebellum_6_R'	0
'Cerebellum_7b_L'	0
'Cerebellum_7b_R'	0
'Cerebellum_8_L'	0
'Cerebellum_8_R'	0
'Cerebellum_9_L'	0
'Cerebellum_9_R'	0
'Cerebellum_10_L'	0
'Cerebellum_10_R'	0
'Vermis_1_2'	0
'Vermis_3'	0
'Vermis_4_5'	0
'Vermis_6'	0
'Vermis_7'	0
'Vermis_8'	0
'Vermis_9'	0
'Vermis_10'	0
'Kurtosis of IC distribution'	0
'Avg_Z_score_10_nodes_highest_connectivity'	0
'Min_cluster_size_10_local_max_region_growing_thresh_2.5'	0
'Percent_total_activation_in_CSF'	0
'Percent_total_activation_MNI152_all_edges'	0
'Percent_total_activation_midbrain'	0
'Percent_total_activation_skull'	0
'Percent_total_activation_ventricles'	0
'Percent_total_activation_in_cerebellum'	0
'Percent_total_activation_spinal_cord'	0
'high_frequency_noise_percentage'	0
'mean_response_over_time'	0
'num_local_maxes_div_by_timepoints'	0
'num_local_mins_div_by_timepoints'	0
'avg_distance_between_max_peaks'	0
'avg_distance_between_min_peaks'	0
'biggest_jump_maxmin'	0
'avg_jump_max_min'	0
'power_band_0.0_to_0.008_Hz'	0
'power_band_0.008_to_0.02_Hz'	0
'power_band_0.02_to_0.05_Hz'	0
'power_band_0.05_to_0.1_Hz'	0
'power_band_0.1_to_0.25_Hz'	0
'skewness_assymetry_ts_around_mean'	0
'kurtosis_measure_how_outlier-prone_ts'	0
'one_lag_auto_correlation'	0
'two_lag_auto_correlation'	0
'three_lag_auto_correlation'	0
'four_lag_auto_correlation'	0
'five_lag_auto_correlation'	0
'temporal_entropy_of_ts'	0
'Hpsd_bin_1_freq0_to_pi_0'	0
'Hpsd_bin_2_freq0_to_pi_0.038312'	0
'Hpsd_bin_3_freq0_to_pi_0.076624'	0
'Hpsd_bin_4_freq0_to_pi_0.11494'	0
'Hpsd_bin_5_freq0_to_pi_0.15325'	0
'Hpsd_bin_6_freq0_to_pi_0.19156'	0
'Hpsd_bin_7_freq0_to_pi_0.22987'	0
'Hpsd_bin_8_freq0_to_pi_0.26818'	0
'Hpsd_bin_9_freq0_to_pi_0.3065'	0
'Hpsd_bin_11_freq0_to_pi_0.38312'	0
'Hpsd_bin_13_freq0_to_pi_0.45975'	0
'Hpsd_bin_14_freq0_to_pi_0.49806'	0
'Hpsd_bin_15_freq0_to_pi_0.53637'	0
'Hpsd_bin_16_freq0_to_pi_0.57468'	0
'Hpsd_bin_17_freq0_to_pi_0.61299'	0
'Hpsd_bin_18_freq0_to_pi_0.65131'	0
'Hpsd_bin_19_freq0_to_pi_0.68962'	0
'Hpsd_bin_20_freq0_to_pi_0.72793'	0
'Hpsd_bin_21_freq0_to_pi_0.76624'	0
'Hpsd_bin_22_freq0_to_pi_0.80455'	0
'Hpsd_bin_23_freq0_to_pi_0.84287'	0
'Hpsd_bin_24_freq0_to_pi_0.88118'	0
'Hpsd_bin_25_freq0_to_pi_0.91949'	0
'Hpsd_bin_26_freq0_to_pi_0.9578'	0
'Hpsd_bin_27_freq0_to_pi_0.99611'	0
'Hpsd_bin_28_freq0_to_pi_1.0344'	0
'Hpsd_bin_29_freq0_to_pi_1.0727'	0
'Hpsd_bin_30_freq0_to_pi_1.1111'	0
'Hpsd_bin_31_freq0_to_pi_1.1494'	0
'Hpsd_bin_32_freq0_to_pi_1.1877'	0
'Hpsd_bin_33_freq0_to_pi_1.226'	0
'Hpsd_bin_34_freq0_to_pi_1.2643'	0
'Hpsd_bin_35_freq0_to_pi_1.3026'	0
'Hpsd_bin_36_freq0_to_pi_1.3409'	0
'Hpsd_bin_37_freq0_to_pi_1.3792'	0
'Hpsd_bin_38_freq0_to_pi_1.4175'	0
'Hpsd_bin_39_freq0_to_pi_1.4559'	0
'Hpsd_bin_41_freq0_to_pi_1.5325'	0
'Hpsd_bin_65_freq0_to_pi_2.452'	0
'Hpsd_bin_66_freq0_to_pi_2.4903'	0
'Hpsd_bin_67_freq0_to_pi_2.5286'	0
'Hpsd_bin_68_freq0_to_pi_2.5669'	0
'Hpsd_bin_69_freq0_to_pi_2.6052'	0
'Hpsd_bin_70_freq0_to_pi_2.6435'	0
'Hpsd_bin_71_freq0_to_pi_2.6818'	0
'Hpsd_bin_72_freq0_to_pi_2.7202'	0
'Hpsd_bin_73_freq0_to_pi_2.7585'	0
'Hpsd_bin_74_freq0_to_pi_2.7968'	0
'Hpsd_bin_75_freq0_to_pi_2.8351'	0
'Hpsd_bin_76_freq0_to_pi_2.8734'	0
'Hpsd_bin_77_freq0_to_pi_2.9117'	0
'Hpsd_bin_78_freq0_to_pi_2.95'	0
'Hpsd_bin_79_freq0_to_pi_2.9883'	0
'Hpsd_bin_80_freq0_to_pi_3.0267'	0
'Hpsd_bin_81_freq0_to_pi_3.065'	0
'Hpsd_bin_82_freq0_to_pi_3.1033'	0
'Hpsd_bin_83_freq0_to_pi_3.1416'	0
'dynamic_range_high'	0
'dynamic_range_low'	0
'dynamic_count_diff_high'	0
'dynamic_count_diff_low'	0
'dynamic_FFT_diff_high'	0
'dynamic_FFT_diff_low'	0
'low_freq_to_high_power_ratio'	0

## Sheet: Model_HeadMotion
Feature	Weight
'Percent_total_activation_skull'	0.549
'Percent_total_activation_in_WM'	-0.1565
'avg_jump_max_min'	-0.1077
'Percentage_activation_voxels_LR_symmetric'	0.0893
'Amygdala_R'	-0.0711
'Percent_total_activation_MNI152_all_edges'	0.0571
'power_band_0.008_to_0.02_Hz'	0.0519
'Percent_total_activation_in_CSF'	0.051
'four_lag_auto_correlation'	0.044
'Amygdala_L'	-0.0425
'Olfactory_L'	-0.0347
'power_band_0.0_to_0.008_Hz'	0.033
'Hpsd_bin_3_freq0_to_pi_0.076624'	0.0319
'Hpsd_bin_2_freq0_to_pi_0.038312'	0.0203
'Avg_distance_btw_10_local_max'	0.0146
'three_lag_auto_correlation'	0.0025
'Precentral_L'	0
'Precentral_R'	0
'Frontal_Sup_L'	0
'Frontal_Sup_R'	0
'Frontal_Sup_Orb_L'	0
'Frontal_Sup_Orb_R'	0
'Frontal_Mid_L'	0
'Frontal_Mid_R'	0
'Frontal_Mid_Orb_L'	0
'Frontal_Mid_Orb_R'	0
'Frontal_Inf_Oper_L'	0
'Frontal_Inf_Oper_R'	0
'Frontal_Inf_Tri_L'	0
'Frontal_Inf_Tri_R'	0
'Frontal_Inf_Orb_L'	0
'Frontal_Inf_Orb_R'	0
'Rolandic_Oper_L'	0
'Rolandic_Oper_R'	0
'Supp_Motor_Area_L'	0
'Supp_Motor_Area_R'	0
'Olfactory_R'	0
'Frontal_Sup_Medial_L'	0
'Frontal_Sup_Medial_R'	0
'Frontal_Med_Orb_L'	0
'Frontal_Med_Orb_R'	0
'Rectus_L'	0
'Rectus_R'	0
'Insula_L'	0
'Insula_R'	0
'Cingulum_Ant_L'	0
'Cingulum_Ant_R'	0
'Cingulum_Mid_L'	0
'Cingulum_Mid_R'	0
'Cingulum_Post_L'	0
'Cingulum_Post_R'	0
'Hippocampus_L'	0
'Hippocampus_R'	0
'ParaHippocampal_L'	0
'ParaHippocampal_R'	0
'Calcarine_L'	0
'Calcarine_R'	0
'Cuneus_L'	0
'Cuneus_R'	0
'Lingual_L'	0
'Lingual_R'	0
'Occipital_Sup_L'	0
'Occipital_Sup_R'	0
'Occipital_Mid_L'	0
'Occipital_Mid_R'	0
'Occipital_Inf_L'	0
'Occipital_Inf_R'	0
'Fusiform_L'	0
'Fusiform_R'	0
'Postcentral_L'	0
'Postcentral_R'	0
'Parietal_Sup_L'	0
'Parietal_Sup_R'	0
'Parietal_Inf_L'	0
'Parietal_Inf_R'	0
'SupraMarginal_L'	0
'SupraMarginal_R'	0
'Angular_L'	0
'Angular_R'	0
'Precuneus_L'	0
'Precuneus_R'	0
'Paracentral_Lobule_L'	0
'Paracentral_Lobule_R'	0
'Caudate_L'	0
'Caudate_R'	0
'Putamen_L'	0
'Putamen_R'	0
'Pallidum_L'	0
'Pallidum_R'	0
'Thalamus_L'	0
'Thalamus_R'	0
'Heschl_L'	0
'Heschl_R'	0
'Temporal_Sup_L'	0
'Temporal_Sup_R'	0
'Temporal_Pole_Sup_L'	0
'Temporal_Pole_Sup_R'	0
'Temporal_Mid_L'	0
'Temporal_Mid_R'	0
'Temporal_Pole_Mid_L'	0
'Temporal_Pole_Mid_R'	0
'Temporal_Inf_L'	0
'Temporal_Inf_R'	0
'Cerebellum_Crus1_L'	0
'Cerebellum_Crus1_R'	0
'Cerebellum_Crus2_L'	0
'Cerebellum_Crus2_R'	0
'Cerebellum_3_L'	0
'Cerebellum_3_R'	0
'Cerebellum_4_5_L'	0
'Cerebellum_4_5_R'	0
'Cerebellum_6_L'	0
'Cerebellum_6_R'	0
'Cerebellum_7b_L'	0
'Cerebellum_7b_R'	0
'Cerebellum_8_L'	0
'Cerebellum_8_R'	0
'Cerebellum_9_L'	0
'Cerebellum_9_R'	0
'Cerebellum_10_L'	0
'Cerebellum_10_R'	0
'Vermis_1_2'	0
'Vermis_3'	0
'Vermis_4_5'	0
'Vermis_6'	0
'Vermis_7'	0
'Vermis_8'	0
'Vermis_9'	0
'Vermis_10'	0
'Kurtosis of IC distribution'	0
'Skewness of IC distribution'	0
'Spatial Entropy of IC distribution'	0
'Avg_Z_score_10_nodes_highest_connectivity'	0
'Mean_cluster_size_10_local_max_region_growing_thresh_2.5'	0
'Min_cluster_size_10_local_max_region_growing_thresh_2.5'	0
'Max_cluster_size_10_local_max_region_growing_thresh_2.5'	0
'Percent_total_activation_in_GM'	0
'Percent_total_activation_in_eyeballs'	0
'Percent_total_activation_midbrain'	0
'Percent_total_activation_ventricles'	0
'Percent_total_activation_in_cerebellum'	0
'Percent_total_activation_spinal_cord'	0
'high_frequency_noise_percentage'	0
'mean_response_over_time'	0
'num_local_maxes_div_by_timepoints'	0
'num_local_mins_div_by_timepoints'	0
'avg_distance_between_max_peaks'	0
'avg_distance_between_min_peaks'	0
'biggest_jump_maxmin'	0
'power_band_0.02_to_0.05_Hz'	0
'power_band_0.05_to_0.1_Hz'	0
'power_band_0.1_to_0.25_Hz'	0
'skewness_assymetry_ts_around_mean'	0
'kurtosis_measure_how_outlier-prone_ts'	0
'one_lag_auto_correlation'	0
'two_lag_auto_correlation'	0
'five_lag_auto_correlation'	0
'temporal_entropy_of_ts'	0
'Hpsd_bin_1_freq0_to_pi_0'	0
'Hpsd_bin_4_freq0_to_pi_0.11494'	0
'Hpsd_bin_5_freq0_to_pi_0.15325'	0
'Hpsd_bin_6_freq0_to_pi_0.19156'	0
'Hpsd_bin_7_freq0_to_pi_0.22987'	0
'Hpsd_bin_8_freq0_to_pi_0.26818'	0
'Hpsd_bin_9_freq0_to_pi_0.3065'	0
'Hpsd_bin_10_freq0_to_pi_0.34481'	0
'Hpsd_bin_11_freq0_to_pi_0.38312'	0
'Hpsd_bin_12_freq0_to_pi_0.42143'	0
'Hpsd_bin_13_freq0_to_pi_0.45975'	0
'Hpsd_bin_14_freq0_to_pi_0.49806'	0
'Hpsd_bin_15_freq0_to_pi_0.53637'	0
'Hpsd_bin_16_freq0_to_pi_0.57468'	0
'Hpsd_bin_17_freq0_to_pi_0.61299'	0
'Hpsd_bin_18_freq0_to_pi_0.65131'	0
'Hpsd_bin_19_freq0_to_pi_0.68962'	0
'Hpsd_bin_20_freq0_to_pi_0.72793'	0
'Hpsd_bin_21_freq0_to_pi_0.76624'	0
'Hpsd_bin_22_freq0_to_pi_0.80455'	0
'Hpsd_bin_23_freq0_to_pi_0.84287'	0
'Hpsd_bin_24_freq0_to_pi_0.88118'	0
'Hpsd_bin_25_freq0_to_pi_0.91949'	0
'Hpsd_bin_26_freq0_to_pi_0.9578'	0
'Hpsd_bin_27_freq0_to_pi_0.99611'	0
'Hpsd_bin_28_freq0_to_pi_1.0344'	0
'Hpsd_bin_29_freq0_to_pi_1.0727'	0
'Hpsd_bin_30_freq0_to_pi_1.1111'	0
'Hpsd_bin_31_freq0_to_pi_1.1494'	0
'Hpsd_bin_32_freq0_to_pi_1.1877'	0
'Hpsd_bin_33_freq0_to_pi_1.226'	0
'Hpsd_bin_34_freq0_to_pi_1.2643'	0
'Hpsd_bin_35_freq0_to_pi_1.3026'	0
'Hpsd_bin_36_freq0_to_pi_1.3409'	0
'Hpsd_bin_37_freq0_to_pi_1.3792'	0
'Hpsd_bin_38_freq0_to_pi_1.4175'	0
'Hpsd_bin_39_freq0_to_pi_1.4559'	0
'Hpsd_bin_40_freq0_to_pi_1.4942'	0
'Hpsd_bin_41_freq0_to_pi_1.5325'	0
'Hpsd_bin_42_freq0_to_pi_1.5708'	0
'Hpsd_bin_43_freq0_to_pi_1.6091'	0
'Hpsd_bin_44_freq0_to_pi_1.6474'	0
'Hpsd_bin_45_freq0_to_pi_1.6857'	0
'Hpsd_bin_46_freq0_to_pi_1.724'	0
'Hpsd_bin_47_freq0_to_pi_1.7624'	0
'Hpsd_bin_48_freq0_to_pi_1.8007'	0
'Hpsd_bin_49_freq0_to_pi_1.839'	0
'Hpsd_bin_50_freq0_to_pi_1.8773'	0
'Hpsd_bin_51_freq0_to_pi_1.9156'	0
'Hpsd_bin_52_freq0_to_pi_1.9539'	0
'Hpsd_bin_53_freq0_to_pi_1.9922'	0
'Hpsd_bin_54_freq0_to_pi_2.0305'	0
'Hpsd_bin_55_freq0_to_pi_2.0689'	0
'Hpsd_bin_56_freq0_to_pi_2.1072'	0
'Hpsd_bin_57_freq0_to_pi_2.1455'	0
'Hpsd_bin_58_freq0_to_pi_2.1838'	0
'Hpsd_bin_59_freq0_to_pi_2.2221'	0
'Hpsd_bin_60_freq0_to_pi_2.2604'	0
'Hpsd_bin_61_freq0_to_pi_2.2987'	0
'Hpsd_bin_62_freq0_to_pi_2.337'	0
'Hpsd_bin_63_freq0_to_pi_2.3754'	0
'Hpsd_bin_64_freq0_to_pi_2.4137'	0
'Hpsd_bin_65_freq0_to_pi_2.452'	0
'Hpsd_bin_66_freq0_to_pi_2.4903'	0
'Hpsd_bin_67_freq0_to_pi_2.5286'	0
'Hpsd_bin_68_freq0_to_pi_2.5669'	0
'Hpsd_bin_69_freq0_to_pi_2.6052'	0
'Hpsd_bin_70_freq0_to_pi_2.6435'	0
'Hpsd_bin_71_freq0_to_pi_2.6818'	0
'Hpsd_bin_72_freq0_to_pi_2.7202'	0
'Hpsd_bin_73_freq0_to_pi_2.7585'	0
'Hpsd_bin_74_freq0_to_pi_2.7968'	0
'Hpsd_bin_75_freq0_to_pi_2.8351'	0
'Hpsd_bin_76_freq0_to_pi_2.8734'	0
'Hpsd_bin_77_freq0_to_pi_2.9117'	0
'Hpsd_bin_78_freq0_to_pi_2.95'	0
'Hpsd_bin_79_freq0_to_pi_2.9883'	0
'Hpsd_bin_80_freq0_to_pi_3.0267'	0
'Hpsd_bin_81_freq0_to_pi_3.065'	0
'Hpsd_bin_82_freq0_to_pi_3.1033'	0
'Hpsd_bin_83_freq0_to_pi_3.1416'	0
'dynamic_range_high'	0
'dynamic_range_low'	0
'dynamic_count_diff_high'	0
'dynamic_count_diff_low'	0
'dynamic_FFT_diff_high'	0
'dynamic_FFT_diff_low'	0
'low_freq_to_high_power_ratio'	0

## Sheet: Model_Ventricles
Features	Weights
'Percent_total_activation_ventricles'	0.5201
'Percent_total_activation_in_WM'	0.2634
'Caudate_R'	0.2459
'Percent_total_activation_in_GM'	-0.2143
'Caudate_L'	0.2025
'Precentral_L'	0
'Precentral_R'	0
'Frontal_Sup_L'	0
'Frontal_Sup_R'	0
'Frontal_Sup_Orb_L'	0
'Frontal_Sup_Orb_R'	0
'Frontal_Mid_L'	0
'Frontal_Mid_R'	0
'Frontal_Mid_Orb_L'	0
'Frontal_Mid_Orb_R'	0
'Frontal_Inf_Oper_L'	0
'Frontal_Inf_Oper_R'	0
'Frontal_Inf_Tri_L'	0
'Frontal_Inf_Tri_R'	0
'Frontal_Inf_Orb_L'	0
'Frontal_Inf_Orb_R'	0
'Rolandic_Oper_L'	0
'Rolandic_Oper_R'	0
'Supp_Motor_Area_L'	0
'Supp_Motor_Area_R'	0
'Olfactory_L'	0
'Olfactory_R'	0
'Frontal_Sup_Medial_L'	0
'Frontal_Sup_Medial_R'	0
'Frontal_Med_Orb_L'	0
'Frontal_Med_Orb_R'	0
'Rectus_L'	0
'Rectus_R'	0
'Insula_L'	0
'Insula_R'	0
'Cingulum_Ant_L'	0
'Cingulum_Ant_R'	0
'Cingulum_Mid_L'	0
'Cingulum_Mid_R'	0
'Cingulum_Post_L'	0
'Cingulum_Post_R'	0
'Hippocampus_L'	0
'Hippocampus_R'	0
'ParaHippocampal_L'	0
'ParaHippocampal_R'	0
'Amygdala_L'	0
'Amygdala_R'	0
'Calcarine_L'	0
'Calcarine_R'	0
'Cuneus_L'	0
'Cuneus_R'	0
'Lingual_L'	0
'Lingual_R'	0
'Occipital_Sup_L'	0
'Occipital_Sup_R'	0
'Occipital_Mid_L'	0
'Occipital_Mid_R'	0
'Occipital_Inf_L'	0
'Occipital_Inf_R'	0
'Fusiform_L'	0
'Fusiform_R'	0
'Postcentral_L'	0
'Postcentral_R'	0
'Parietal_Sup_L'	0
'Parietal_Sup_R'	0
'Parietal_Inf_L'	0
'Parietal_Inf_R'	0
'SupraMarginal_L'	0
'SupraMarginal_R'	0
'Angular_L'	0
'Angular_R'	0
'Precuneus_L'	0
'Precuneus_R'	0
'Paracentral_Lobule_L'	0
'Paracentral_Lobule_R'	0
'Putamen_L'	0
'Putamen_R'	0
'Pallidum_L'	0
'Pallidum_R'	0
'Thalamus_L'	0
'Thalamus_R'	0
'Heschl_L'	0
'Heschl_R'	0
'Temporal_Sup_L'	0
'Temporal_Sup_R'	0
'Temporal_Pole_Sup_L'	0
'Temporal_Pole_Sup_R'	0
'Temporal_Mid_L'	0
'Temporal_Mid_R'	0
'Temporal_Pole_Mid_L'	0
'Temporal_Pole_Mid_R'	0
'Temporal_Inf_L'	0
'Temporal_Inf_R'	0
'Cerebellum_Crus1_L'	0
'Cerebellum_Crus1_R'	0
'Cerebellum_Crus2_L'	0
'Cerebellum_Crus2_R'	0
'Cerebellum_3_L'	0
'Cerebellum_3_R'	0
'Cerebellum_4_5_L'	0
'Cerebellum_4_5_R'	0
'Cerebellum_6_L'	0
'Cerebellum_6_R'	0
'Cerebellum_7b_L'	0
'Cerebellum_7b_R'	0
'Cerebellum_8_L'	0
'Cerebellum_8_R'	0
'Cerebellum_9_L'	0
'Cerebellum_9_R'	0
'Cerebellum_10_L'	0
'Cerebellum_10_R'	0
'Vermis_1_2'	0
'Vermis_3'	0
'Vermis_4_5'	0
'Vermis_6'	0
'Vermis_7'	0
'Vermis_8'	0
'Vermis_9'	0
'Vermis_10'	0
'Kurtosis of IC distribution'	0
'Skewness of IC distribution'	0
'Spatial Entropy of IC distribution'	0
'Avg_distance_btw_10_local_max'	0
'Avg_Z_score_10_nodes_highest_connectivity'	0
'Mean_cluster_size_10_local_max_region_growing_thresh_2.5'	0
'Min_cluster_size_10_local_max_region_growing_thresh_2.5'	0
'Max_cluster_size_10_local_max_region_growing_thresh_2.5'	0
'Percentage_activation_voxels_LR_symmetric'	0
'Percent_total_activation_in_CSF'	0
'Percent_total_activation_in_eyeballs'	0
'Percent_total_activation_MNI152_all_edges'	0
'Percent_total_activation_midbrain'	0
'Percent_total_activation_skull'	0
'Percent_total_activation_in_cerebellum'	0
'Percent_total_activation_spinal_cord'	0
'high_frequency_noise_percentage'	0
'mean_response_over_time'	0
'num_local_maxes_div_by_timepoints'	0
'num_local_mins_div_by_timepoints'	0
'avg_distance_between_max_peaks'	0
'avg_distance_between_min_peaks'	0
'biggest_jump_maxmin'	0
'avg_jump_max_min'	0
'power_band_0.0_to_0.008_Hz'	0
'power_band_0.008_to_0.02_Hz'	0
'power_band_0.02_to_0.05_Hz'	0
'power_band_0.05_to_0.1_Hz'	0
'power_band_0.1_to_0.25_Hz'	0
'skewness_assymetry_ts_around_mean'	0
'kurtosis_measure_how_outlier-prone_ts'	0
'one_lag_auto_correlation'	0
'two_lag_auto_correlation'	0
'three_lag_auto_correlation'	0
'four_lag_auto_correlation'	0
'five_lag_auto_correlation'	0
'temporal_entropy_of_ts'	0
'Hpsd_bin_1_freq0_to_pi_0'	0
'Hpsd_bin_2_freq0_to_pi_0.038312'	0
'Hpsd_bin_3_freq0_to_pi_0.076624'	0
'Hpsd_bin_4_freq0_to_pi_0.11494'	0
'Hpsd_bin_5_freq0_to_pi_0.15325'	0
'Hpsd_bin_6_freq0_to_pi_0.19156'	0
'Hpsd_bin_7_freq0_to_pi_0.22987'	0
'Hpsd_bin_8_freq0_to_pi_0.26818'	0
'Hpsd_bin_9_freq0_to_pi_0.3065'	0
'Hpsd_bin_10_freq0_to_pi_0.34481'	0
'Hpsd_bin_11_freq0_to_pi_0.38312'	0
'Hpsd_bin_12_freq0_to_pi_0.42143'	0
'Hpsd_bin_13_freq0_to_pi_0.45975'	0
'Hpsd_bin_14_freq0_to_pi_0.49806'	0
'Hpsd_bin_15_freq0_to_pi_0.53637'	0
'Hpsd_bin_16_freq0_to_pi_0.57468'	0
'Hpsd_bin_17_freq0_to_pi_0.61299'	0
'Hpsd_bin_18_freq0_to_pi_0.65131'	0
'Hpsd_bin_19_freq0_to_pi_0.68962'	0
'Hpsd_bin_20_freq0_to_pi_0.72793'	0
'Hpsd_bin_21_freq0_to_pi_0.76624'	0
'Hpsd_bin_22_freq0_to_pi_0.80455'	0
'Hpsd_bin_23_freq0_to_pi_0.84287'	0
'Hpsd_bin_24_freq0_to_pi_0.88118'	0
'Hpsd_bin_25_freq0_to_pi_0.91949'	0
'Hpsd_bin_26_freq0_to_pi_0.9578'	0
'Hpsd_bin_27_freq0_to_pi_0.99611'	0
'Hpsd_bin_28_freq0_to_pi_1.0344'	0
'Hpsd_bin_29_freq0_to_pi_1.0727'	0
'Hpsd_bin_30_freq0_to_pi_1.1111'	0
'Hpsd_bin_31_freq0_to_pi_1.1494'	0
'Hpsd_bin_32_freq0_to_pi_1.1877'	0
'Hpsd_bin_33_freq0_to_pi_1.226'	0
'Hpsd_bin_34_freq0_to_pi_1.2643'	0
'Hpsd_bin_35_freq0_to_pi_1.3026'	0
'Hpsd_bin_36_freq0_to_pi_1.3409'	0
'Hpsd_bin_37_freq0_to_pi_1.3792'	0
'Hpsd_bin_38_freq0_to_pi_1.4175'	0
'Hpsd_bin_39_freq0_to_pi_1.4559'	0
'Hpsd_bin_40_freq0_to_pi_1.4942'	0
'Hpsd_bin_41_freq0_to_pi_1.5325'	0
'Hpsd_bin_42_freq0_to_pi_1.5708'	0
'Hpsd_bin_43_freq0_to_pi_1.6091'	0
'Hpsd_bin_44_freq0_to_pi_1.6474'	0
'Hpsd_bin_45_freq0_to_pi_1.6857'	0
'Hpsd_bin_46_freq0_to_pi_1.724'	0
'Hpsd_bin_47_freq0_to_pi_1.7624'	0
'Hpsd_bin_48_freq0_to_pi_1.8007'	0
'Hpsd_bin_49_freq0_to_pi_1.839'	0
'Hpsd_bin_50_freq0_to_pi_1.8773'	0
'Hpsd_bin_51_freq0_to_pi_1.9156'	0
'Hpsd_bin_52_freq0_to_pi_1.9539'	0
'Hpsd_bin_53_freq0_to_pi_1.9922'	0
'Hpsd_bin_54_freq0_to_pi_2.0305'	0
'Hpsd_bin_55_freq0_to_pi_2.0689'	0
'Hpsd_bin_56_freq0_to_pi_2.1072'	0
'Hpsd_bin_57_freq0_to_pi_2.1455'	0
'Hpsd_bin_58_freq0_to_pi_2.1838'	0
'Hpsd_bin_59_freq0_to_pi_2.2221'	0
'Hpsd_bin_60_freq0_to_pi_2.2604'	0
'Hpsd_bin_61_freq0_to_pi_2.2987'	0
'Hpsd_bin_62_freq0_to_pi_2.337'	0
'Hpsd_bin_63_freq0_to_pi_2.3754'	0
'Hpsd_bin_64_freq0_to_pi_2.4137'	0
'Hpsd_bin_65_freq0_to_pi_2.452'	0
'Hpsd_bin_66_freq0_to_pi_2.4903'	0
'Hpsd_bin_67_freq0_to_pi_2.5286'	0
'Hpsd_bin_68_freq0_to_pi_2.5669'	0
'Hpsd_bin_69_freq0_to_pi_2.6052'	0
'Hpsd_bin_70_freq0_to_pi_2.6435'	0
'Hpsd_bin_71_freq0_to_pi_2.6818'	0
'Hpsd_bin_72_freq0_to_pi_2.7202'	0
'Hpsd_bin_73_freq0_to_pi_2.7585'	0
'Hpsd_bin_74_freq0_to_pi_2.7968'	0
'Hpsd_bin_75_freq0_to_pi_2.8351'	0
'Hpsd_bin_76_freq0_to_pi_2.8734'	0
'Hpsd_bin_77_freq0_to_pi_2.9117'	0
'Hpsd_bin_78_freq0_to_pi_2.95'	0
'Hpsd_bin_79_freq0_to_pi_2.9883'	0
'Hpsd_bin_80_freq0_to_pi_3.0267'	0
'Hpsd_bin_81_freq0_to_pi_3.065'	0
'Hpsd_bin_82_freq0_to_pi_3.1033'	0
'Hpsd_bin_83_freq0_to_pi_3.1416'	0
'dynamic_range_high'	0
'dynamic_range_low'	0
'dynamic_count_diff_high'	0
'dynamic_count_diff_low'	0
'dynamic_FFT_diff_high'	0
'dynamic_FFT_diff_low'	0
'low_freq_to_high_power_ratio'	0

## Sheet: Group_AllNoise
Features	Weights
'Percent_total_activation_in_GM'	-0.7905
'dynamic_count_diff_low'	-0.5534
'Frontal_Inf_Tri_L'	-0.5432
'Temporal_Pole_Mid_L'	0.4395
'kurtosis_measure_how_outlier-prone_ts'	0.3655
'Cerebellum_Crus1_L'	-0.3348
'Insula_L'	-0.2233
'Angular_R'	-0.1752
'Cuneus_R'	-0.1367
'Skewness of IC distribution'	0.1189
'Cingulum_Mid_L'	-0.0743
'Occipital_Sup_R'	-0.0314
'four_lag_auto_correlation'	0.0131
'Frontal_Med_Orb_R'	-0.0129
'SupraMarginal_L'	-0.0077
'Precentral_L'	0
'Precentral_R'	0
'Frontal_Sup_L'	0
'Frontal_Sup_R'	0
'Frontal_Sup_Orb_L'	0
'Frontal_Sup_Orb_R'	0
'Frontal_Mid_L'	0
'Frontal_Mid_R'	0
'Frontal_Mid_Orb_L'	0
'Frontal_Mid_Orb_R'	0
'Frontal_Inf_Oper_L'	0
'Frontal_Inf_Oper_R'	0
'Frontal_Inf_Tri_R'	0
'Frontal_Inf_Orb_L'	0
'Frontal_Inf_Orb_R'	0
'Rolandic_Oper_L'	0
'Rolandic_Oper_R'	0
'Supp_Motor_Area_L'	0
'Supp_Motor_Area_R'	0
'Olfactory_L'	0
'Olfactory_R'	0
'Frontal_Sup_Medial_L'	0
'Frontal_Sup_Medial_R'	0
'Frontal_Med_Orb_L'	0
'Rectus_L'	0
'Rectus_R'	0
'Insula_R'	0
'Cingulum_Ant_L'	0
'Cingulum_Ant_R'	0
'Cingulum_Mid_R'	0
'Cingulum_Post_L'	0
'Cingulum_Post_R'	0
'Hippocampus_L'	0
'Hippocampus_R'	0
'ParaHippocampal_L'	0
'ParaHippocampal_R'	0
'Amygdala_L'	0
'Amygdala_R'	0
'Calcarine_L'	0
'Calcarine_R'	0
'Cuneus_L'	0
'Lingual_L'	0
'Lingual_R'	0
'Occipital_Sup_L'	0
'Occipital_Mid_L'	0
'Occipital_Mid_R'	0
'Occipital_Inf_L'	0
'Occipital_Inf_R'	0
'Fusiform_L'	0
'Fusiform_R'	0
'Postcentral_L'	0
'Postcentral_R'	0
'Parietal_Sup_L'	0
'Parietal_Sup_R'	0
'Parietal_Inf_L'	0
'Parietal_Inf_R'	0
'SupraMarginal_R'	0
'Angular_L'	0
'Precuneus_L'	0
'Precuneus_R'	0
'Paracentral_Lobule_L'	0
'Paracentral_Lobule_R'	0
'Caudate_L'	0
'Caudate_R'	0
'Putamen_L'	0
'Putamen_R'	0
'Pallidum_L'	0
'Pallidum_R'	0
'Thalamus_L'	0
'Thalamus_R'	0
'Heschl_L'	0
'Heschl_R'	0
'Temporal_Sup_L'	0
'Temporal_Sup_R'	0
'Temporal_Pole_Sup_L'	0
'Temporal_Pole_Sup_R'	0
'Temporal_Mid_L'	0
'Temporal_Mid_R'	0
'Temporal_Pole_Mid_R'	0
'Temporal_Inf_L'	0
'Temporal_Inf_R'	0
'Cerebellum_Crus1_R'	0
'Cerebellum_Crus2_L'	0
'Cerebellum_Crus2_R'	0
'Cerebellum_3_L'	0
'Cerebellum_3_R'	0
'Cerebellum_4_5_L'	0
'Cerebellum_4_5_R'	0
'Cerebellum_6_L'	0
'Cerebellum_6_R'	0
'Cerebellum_7b_L'	0
'Cerebellum_7b_R'	0
'Cerebellum_8_L'	0
'Cerebellum_8_R'	0
'Cerebellum_9_L'	0
'Cerebellum_9_R'	0
'Cerebellum_10_L'	0
'Cerebellum_10_R'	0
'Vermis_1_2'	0
'Vermis_3'	0
'Vermis_4_5'	0
'Vermis_6'	0
'Vermis_7'	0
'Vermis_8'	0
'Vermis_9'	0
'Vermis_10'	0
'Kurtosis of IC distribution'	0
'Spatial Entropy of IC distribution'	0
'Avg_distance_btw_10_local_max'	0
'Avg_Z_score_10_nodes_highest_connectivity'	0
'Mean_cluster_size_10_local_max_region_growing_thresh_2.5'	0
'Min_cluster_size_10_local_max_region_growing_thresh_2.5'	0
'Max_cluster_size_10_local_max_region_growing_thresh_2.5'	0
'Percentage_activation_voxels_LR_symmetric'	0
'Percent_total_activation_in_WM'	0
'Percent_total_activation_in_CSF'	0
'Percent_total_activation_in_eyeballs'	0
'Percent_total_activation_MNI152_all_edges'	0
'Percent_total_activation_midbrain'	0
'Percent_total_activation_skull'	0
'Percent_total_activation_ventricles'	0
'Percent_total_activation_in_cerebellum'	0
'Percent_total_activation_spinal_cord'	0
'high_frequency_noise_percentage'	0
'mean_response_over_time'	0
'num_local_maxes_div_by_timepoints'	0
'num_local_mins_div_by_timepoints'	0
'avg_distance_between_max_peaks'	0
'avg_distance_between_min_peaks'	0
'biggest_jump_maxmin'	0
'avg_jump_max_min'	0
'power_band_0.0_to_0.008_Hz'	0
'power_band_0.008_to_0.02_Hz'	0
'power_band_0.02_to_0.05_Hz'	0
'power_band_0.05_to_0.1_Hz'	0
'power_band_0.1_to_0.25_Hz'	0
'skewness_assymetry_ts_around_mean'	0
'one_lag_auto_correlation'	0
'two_lag_auto_correlation'	0
'three_lag_auto_correlation'	0
'five_lag_auto_correlation'	0
'temporal_entropy_of_ts'	0
'Hpsd_bin_1_freq0_to_pi_0'	0
'Hpsd_bin_2_freq0_to_pi_0.038312'	0
'Hpsd_bin_3_freq0_to_pi_0.076624'	0
'Hpsd_bin_4_freq0_to_pi_0.11494'	0
'Hpsd_bin_5_freq0_to_pi_0.15325'	0
'Hpsd_bin_6_freq0_to_pi_0.19156'	0
'Hpsd_bin_7_freq0_to_pi_0.22987'	0
'Hpsd_bin_8_freq0_to_pi_0.26818'	0
'Hpsd_bin_9_freq0_to_pi_0.3065'	0
'Hpsd_bin_10_freq0_to_pi_0.34481'	0
'Hpsd_bin_11_freq0_to_pi_0.38312'	0
'Hpsd_bin_12_freq0_to_pi_0.42143'	0
'Hpsd_bin_13_freq0_to_pi_0.45975'	0
'Hpsd_bin_14_freq0_to_pi_0.49806'	0
'Hpsd_bin_15_freq0_to_pi_0.53637'	0
'Hpsd_bin_16_freq0_to_pi_0.57468'	0
'Hpsd_bin_17_freq0_to_pi_0.61299'	0
'Hpsd_bin_18_freq0_to_pi_0.65131'	0
'Hpsd_bin_19_freq0_to_pi_0.68962'	0
'Hpsd_bin_20_freq0_to_pi_0.72793'	0
'Hpsd_bin_21_freq0_to_pi_0.76624'	0
'Hpsd_bin_22_freq0_to_pi_0.80455'	0
'Hpsd_bin_23_freq0_to_pi_0.84287'	0
'Hpsd_bin_24_freq0_to_pi_0.88118'	0
'Hpsd_bin_25_freq0_to_pi_0.91949'	0
'Hpsd_bin_26_freq0_to_pi_0.9578'	0
'Hpsd_bin_27_freq0_to_pi_0.99611'	0
'Hpsd_bin_28_freq0_to_pi_1.0344'	0
'Hpsd_bin_29_freq0_to_pi_1.0727'	0
'Hpsd_bin_30_freq0_to_pi_1.1111'	0
'Hpsd_bin_31_freq0_to_pi_1.1494'	0
'Hpsd_bin_32_freq0_to_pi_1.1877'	0
'Hpsd_bin_33_freq0_to_pi_1.226'	0
'Hpsd_bin_34_freq0_to_pi_1.2643'	0
'Hpsd_bin_35_freq0_to_pi_1.3026'	0
'Hpsd_bin_36_freq0_to_pi_1.3409'	0
'Hpsd_bin_37_freq0_to_pi_1.3792'	0
'Hpsd_bin_38_freq0_to_pi_1.4175'	0
'Hpsd_bin_39_freq0_to_pi_1.4559'	0
'Hpsd_bin_40_freq0_to_pi_1.4942'	0
'Hpsd_bin_41_freq0_to_pi_1.5325'	0
'Hpsd_bin_42_freq0_to_pi_1.5708'	0
'Hpsd_bin_43_freq0_to_pi_1.6091'	0
'Hpsd_bin_44_freq0_to_pi_1.6474'	0
'Hpsd_bin_45_freq0_to_pi_1.6857'	0
'Hpsd_bin_46_freq0_to_pi_1.724'	0
'Hpsd_bin_47_freq0_to_pi_1.7624'	0
'Hpsd_bin_48_freq0_to_pi_1.8007'	0
'Hpsd_bin_49_freq0_to_pi_1.839'	0
'Hpsd_bin_50_freq0_to_pi_1.8773'	0
'Hpsd_bin_51_freq0_to_pi_1.9156'	0
'Hpsd_bin_52_freq0_to_pi_1.9539'	0
'Hpsd_bin_53_freq0_to_pi_1.9922'	0
'Hpsd_bin_54_freq0_to_pi_2.0305'	0
'Hpsd_bin_55_freq0_to_pi_2.0689'	0
'Hpsd_bin_56_freq0_to_pi_2.1072'	0
'Hpsd_bin_57_freq0_to_pi_2.1455'	0
'Hpsd_bin_58_freq0_to_pi_2.1838'	0
'Hpsd_bin_59_freq0_to_pi_2.2221'	0
'Hpsd_bin_60_freq0_to_pi_2.2604'	0
'Hpsd_bin_61_freq0_to_pi_2.2987'	0
'Hpsd_bin_62_freq0_to_pi_2.337'	0
'Hpsd_bin_63_freq0_to_pi_2.3754'	0
'Hpsd_bin_64_freq0_to_pi_2.4137'	0
'Hpsd_bin_65_freq0_to_pi_2.452'	0
'Hpsd_bin_66_freq0_to_pi_2.4903'	0
'Hpsd_bin_67_freq0_to_pi_2.5286'	0
'Hpsd_bin_68_freq0_to_pi_2.5669'	0
'Hpsd_bin_69_freq0_to_pi_2.6052'	0
'Hpsd_bin_70_freq0_to_pi_2.6435'	0
'Hpsd_bin_71_freq0_to_pi_2.6818'	0
'Hpsd_bin_72_freq0_to_pi_2.7202'	0
'Hpsd_bin_73_freq0_to_pi_2.7585'	0
'Hpsd_bin_74_freq0_to_pi_2.7968'	0
'Hpsd_bin_75_freq0_to_pi_2.8351'	0
'Hpsd_bin_76_freq0_to_pi_2.8734'	0
'Hpsd_bin_77_freq0_to_pi_2.9117'	0
'Hpsd_bin_78_freq0_to_pi_2.95'	0
'Hpsd_bin_79_freq0_to_pi_2.9883'	0
'Hpsd_bin_80_freq0_to_pi_3.0267'	0
'Hpsd_bin_81_freq0_to_pi_3.065'	0
'Hpsd_bin_82_freq0_to_pi_3.1033'	0
'Hpsd_bin_83_freq0_to_pi_3.1416'	0
'dynamic_range_high'	0
'dynamic_range_low'	0
'dynamic_count_diff_high'	0
'dynamic_FFT_diff_high'	0
'dynamic_FFT_diff_low'	0
'low_freq_to_high_power_ratio'	0
